# Supplementary material
Source: HighWire-hosted journal article supplement (https://srh.bmj.com/content/48/2/103)
Supplement: inline-supplementary-material-1 [file inline-supplementary-material-1.pdf]

Appendix: Survey questions used to assess abortion decision-making and measures of accessibility and acceptability

**Abortion method and delivery method decision-making:**

| <b>MEASURE</b>                              | <b>QUESTION</b>                                                                                                                                                                        | <b>RESPONSE</b>                                                                                                                                                                                                                                                                                                                                                                                                                                                                                                                                                                 |
|---------------------------------------------|----------------------------------------------------------------------------------------------------------------------------------------------------------------------------------------|---------------------------------------------------------------------------------------------------------------------------------------------------------------------------------------------------------------------------------------------------------------------------------------------------------------------------------------------------------------------------------------------------------------------------------------------------------------------------------------------------------------------------------------------------------------------------------|
| DESIRES RELATED TO ABORTION METHOD          | When you were deciding about having a medical abortion (the abortion pill) or a surgical (or suction) abortion, how did you feel?                                                      | <input type="checkbox"/> I strongly wanted the abortion pill<br><input type="checkbox"/> I was leaning toward the abortion pill<br><input type="checkbox"/> No strong feeling either way<br><input type="checkbox"/> I was leaning toward surgical abortion<br><input type="checkbox"/> I strongly wanted surgical abortion<br><input type="checkbox"/> Prefer not to answer                                                                                                                                                                                                    |
| DESIRES RELATED TO ABORTION DELIVERY METHOD | When you were deciding where to have your abortion and what type of abortion you were going to have, what was the most important factor that influenced your decision? [Pick one only] | <input type="checkbox"/> I wanted to have the abortion as soon as possible<br><input type="checkbox"/> I wanted to have the abortion as close to my home as possible<br><input type="checkbox"/> I wanted to have the abortion in a certain clinic or city<br><input type="checkbox"/> I wanted to have the abortion in my home<br><input type="checkbox"/> I wanted to have the abortion pill (or medical abortion)<br><input type="checkbox"/> Another reason. Explain:<br><input type="checkbox"/> Prefer not to answer                                                      |
|                                             | When you were deciding where to have your abortion, what factors made you want to have your abortion at home? [Pick all that apply]                                                    | <input type="checkbox"/> It was more comfortable<br><input type="checkbox"/> It was more private<br><input type="checkbox"/> A partner, friend, or family member could be present<br><input type="checkbox"/> It was better for my schedule/could be scheduled around my responsibilities<br><input type="checkbox"/> It could be scheduled sooner<br><input type="checkbox"/> I would have had to travel a long distance to visit a provider in-person<br><input type="checkbox"/> I did not want to have my abortion at home<br><input type="checkbox"/> Prefer not to answer |

**Accessibility:**

| <b>MEASURE</b>    | <b>QUESTION</b>                                                                                                                                                                        | <b>RESPONSE</b>                                                                                                                                                                                                                                                                                                                                                      |
|-------------------|----------------------------------------------------------------------------------------------------------------------------------------------------------------------------------------|----------------------------------------------------------------------------------------------------------------------------------------------------------------------------------------------------------------------------------------------------------------------------------------------------------------------------------------------------------------------|
| TIME TO CARE      | How long was it between when you first realised you were pregnant and when you first contacted a Dr. Marie clinic?                                                                     | _____days AND/OR _____ weeks<br><input type="checkbox"/> Prefer not to answer                                                                                                                                                                                                                                                                                        |
|                   | How long was it between when you first contacted a Dr. Marie clinic and when you took your first prescribed abortion medication?                                                       | _____days AND/OR _____weeks<br><input type="checkbox"/> Prefer not to answer                                                                                                                                                                                                                                                                                         |
| DISTANCE TO CARE  | How far did you travel from your home to the Dr. Marie clinic or the GP clinic where you had the initial abortion visit (one way)?<br>Please try to estimate the number of kilometers. | _____ kilometers (one way)                                                                                                                                                                                                                                                                                                                                           |
| MODE OF TRANSPORT | How did you get to the [GP office or Dr. Marie clinic]?                                                                                                                                | <input type="checkbox"/> Plane<br><input type="checkbox"/> Private car<br><input type="checkbox"/> Taxi<br><input type="checkbox"/> Bus<br><input type="checkbox"/> Airplane<br><input type="checkbox"/> Other<br><input type="checkbox"/> Prefer not to answer                                                                                                      |
| BARRIER TO CARE   | Did you experience any of the following in order to attend your abortion appointment ? [Check all that apply]                                                                          | <input type="checkbox"/> Had to take time off of work<br><input type="checkbox"/> Had to miss class<br><input type="checkbox"/> Had to pay to stay overnight<br><input type="checkbox"/> Had to pay for childcare<br><input type="checkbox"/> Had to pay for public transportation<br><input type="checkbox"/> None<br><input type="checkbox"/> Prefer not to answer |

**Acceptability:**

| <b>MEASURE</b>                                      | <b>QUESTION</b>                                                                                                                                                                                                              | <b>RESPONSE</b>                                                                                                                                                                                                                                                                                                                                |
|-----------------------------------------------------|------------------------------------------------------------------------------------------------------------------------------------------------------------------------------------------------------------------------------|------------------------------------------------------------------------------------------------------------------------------------------------------------------------------------------------------------------------------------------------------------------------------------------------------------------------------------------------|
| SATISFACTION WITH ABORTION SERVICE                  | Overall, how satisfied are you with the abortion service you received? [Mark one option]                                                                                                                                     | <input type="checkbox"/> Very satisfied<br><input type="checkbox"/> Somewhat satisfied<br><input type="checkbox"/> Somewhat <u>d</u> issatisfied<br><input type="checkbox"/> Very <u>d</u> issatisfied If you were not 'Very satisfied,' please explain:<br><input type="checkbox"/> Not sure<br><input type="checkbox"/> Prefer not to answer |
|                                                     | What did you like <u>best</u> about the care that you received from Dr. Marie?                                                                                                                                               | Open text                                                                                                                                                                                                                                                                                                                                      |
| SATISFACTION WITH CLINIC STAFF                      | When you spoke with staff at the Dr. Marie clinic to schedule your appointment, were you given information about the option of having your abortion via telemedicine (using the videoconference)?                            | <input type="checkbox"/> Yes <input type="checkbox"/> No <input type="checkbox"/> Not sure                                                                                                                                                                                                                                                     |
|                                                     | When you spoke with the staff at the Dr. Marie clinic to schedule your appointment, did you receive enough information about what to expect with telemedicine?                                                               | <input type="checkbox"/> Yes <input type="checkbox"/> No <input type="checkbox"/> Not sure                                                                                                                                                                                                                                                     |
|                                                     | During your appointment with Dr. Marie were you given any information about contraception you could use after your abortion?                                                                                                 | <input type="checkbox"/> Yes <input type="checkbox"/> No <input type="checkbox"/> Not sure                                                                                                                                                                                                                                                     |
| SATISFACTION WITH DOCTOR WHO PROVIDED ABORTION PILL | How satisfied were you with the information you were given by the Dr. Marie clinic about what contraception you could use after the abortion? [Mark one option]                                                              | <input type="checkbox"/> Very satisfied<br><input type="checkbox"/> Somewhat satisfied<br><input type="checkbox"/> Somewhat <u>d</u> issatisfied<br><input type="checkbox"/> Very <u>d</u> issatisfied<br><input type="checkbox"/> Not sure<br><input type="checkbox"/> Prefer not to answer                                                   |
|                                                     | How satisfied were you with the conversation you had with the Dr. Marie doctor who spoke with you about the abortion pill? [Mark one option]                                                                                 | <input type="checkbox"/> Very satisfied<br><input type="checkbox"/> Somewhat satisfied<br><input type="checkbox"/> Somewhat <u>d</u> issatisfied<br><input type="checkbox"/> Very <u>d</u> issatisfied<br><input type="checkbox"/> Not sure<br><input type="checkbox"/> Prefer not to answer                                                   |
| RECOMMEND THE ABORTION SERVICE                      | If you had a friend who was in a similar situation and who had decided to have an abortion, would you recommend that she have a medical abortion (the abortion pill) the same way you did (with the videoconference or not)? | <input type="checkbox"/> Yes<br><input type="checkbox"/> No<br><input type="checkbox"/> Depends<br><input type="checkbox"/> Not sure<br><input type="checkbox"/> Prefer not to answer                                                                                                                                                          |
| PREFERENCE FOR IN-PERSON CARE                       | Would you have preferred to be in the same room with the doctor rather than talking to the doctor via videoconference?                                                                                                       | <input type="checkbox"/> Yes<br><input type="checkbox"/> No<br><input type="checkbox"/> Prefer not to answer                                                                                                                                                                                                                                   |
